# Supplementary material for: EDL structure of ionic liquid-MXene-based supercapacitor and hydrogen bond role on the interface: a molecular dynamics simulation investigation
Source: Royal Society of Chemistry journal article supplement (doi:10.1039/d1cp05355h), 2022-01-01
Supplement: d1cp05355h1.pdf [file d1cp05355h1.pdf]

## Supplementary material

### **EDL structure of ionic liquid-MXene-based supercapacitor and hydrogen bond role on the interface: A molecular dynamics simulation investigation**

Ziyi Wang <sup>a</sup>, Junwu Chen <sup>b</sup>, Yao Li <sup>b</sup>, Kun Dong <sup>\*b</sup> and Yinghao Yu<sup>\*a</sup>

<sup>a</sup> School of Chemistry and Chemical Engineering, South China University of Technology, Guangzhou, Guangdong 510641, P.R China.

<sup>b</sup> Beijing Key Laboratory of Ionic Liquids Clean Process, State Key Laboratory of Multiphase Complex Systems, Institute of Process Engineering, Chinese Academy of Sciences, Beijing 100190, P.R. China

Corresponding authors: [dongkun@ipe.ac.cn](mailto:dongkun@ipe.ac.cn); [ceyhyu@scut.edu.cn](mailto:ceyhyu@scut.edu.cn)

**Table S1** Lennard-Jones components and point charge parameters for  $\text{Ti}_3\text{C}_2\text{O}_2$ .

| Atom     | L-J parameters and point charge |                     |               |
|----------|---------------------------------|---------------------|---------------|
|          | $\epsilon/\text{kcal.mol}^{-1}$ | $\sigma/\text{\AA}$ | charge/ $e^-$ |
| Ti-inner | 0.6087                          | 1.9565              | 0.68          |
| Ti-outer | 0.6087                          | 1.9565              | 1.04          |
| C        | 0.0660                          | 3.5000              | -0.74         |
| O        | 0.1554                          | 3.1656              | -0.64         |

**Table S2** Lennard-Jones components and point charge parameters for  $\text{Ti}_3\text{C}_2(\text{OH})_2$ .

| Atom     | Lennard-Jones and point charge parameters |                     |               |
|----------|-------------------------------------------|---------------------|---------------|
|          | $\epsilon/\text{kcal.mol}^{-1}$           | $\sigma/\text{\AA}$ | charge/ $e^-$ |
| Ti-inner | 0.6087                                    | 1.9565              | 0.64          |
| Ti-outer | 0.6087                                    | 1.9565              | 0.88          |
| C        | 0.0660                                    | 3.5000              | -0.76         |
| O        | 0.1554                                    | 3.1656              | -0.79         |
| H        | 0.1554                                    | 1.5000              | 0.35          |

**Table S3** The ion diffusion coefficients ( $10^{-6} \text{ cm}^2 \text{ s}^{-1}$ ) of the ILs ( $[\text{HEMIm}][\text{NTf}_2]$  and  $[\text{EMIM}][\text{NTf}_2]$ ) in the bulk

|                                | $D_{\text{cation}}$ | $D_{\text{anion}}$ | $D_{\text{cation}} + D_{\text{anion}}$ |
|--------------------------------|---------------------|--------------------|----------------------------------------|
| $[\text{EMIM}][\text{NTf}_2]$  | 2.27                | 1.94               | 4.21                                   |
| $[\text{HEMIm}][\text{NTf}_2]$ | 1.77                | 1.41               | 3.18                                   |

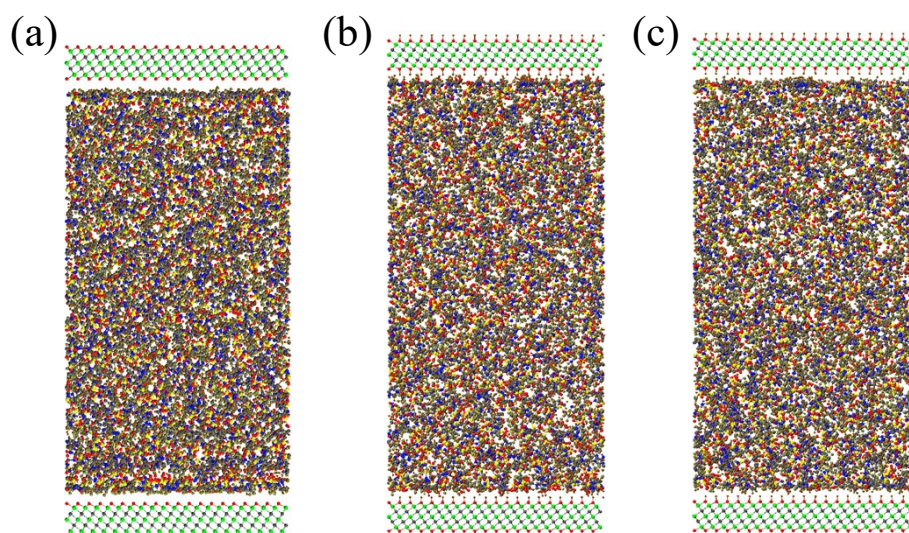

**Fig. S1** A snapshot of the simulation box composed of (a) the [EMIM][NTf<sub>2</sub>] and Ti<sub>3</sub>C<sub>2</sub>O<sub>2</sub>, (b) the [HEMIm][NTf<sub>2</sub>] and Ti<sub>3</sub>C<sub>2</sub>(OH)<sub>2</sub>, (c) the [EMIM][NTf<sub>2</sub>] and Ti<sub>3</sub>C<sub>2</sub>(OH)<sub>2</sub>

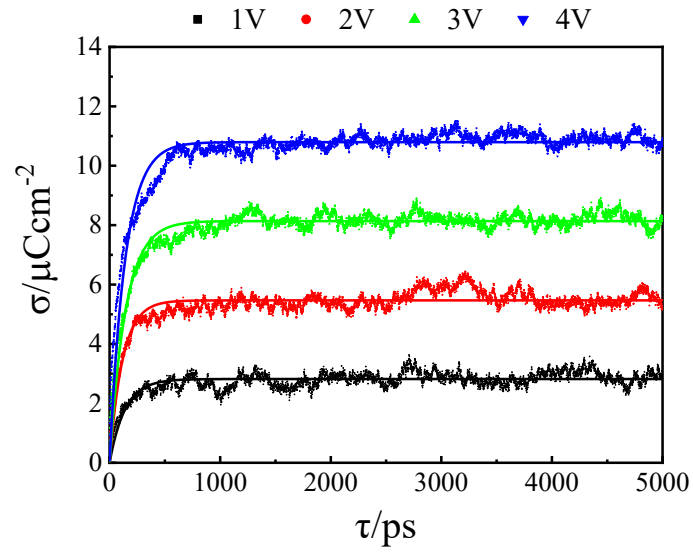

**Fig. S2** Evolution of the charge density  $\sigma$  on electrode surface during the charging process with applying a series of potential differences to the  $\text{Ti}_3\text{C}_2\text{O}_2$  electrodes for  $[\text{HEMIm}][\text{NTf}_2]$ .

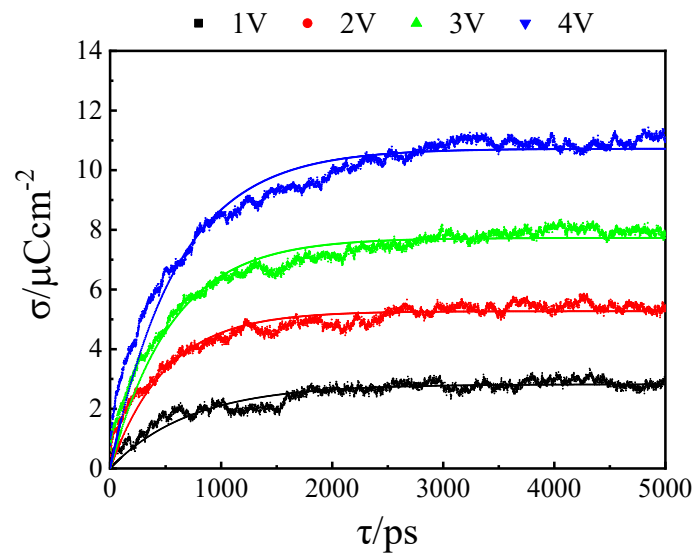

**Fig. S3** Evolution of the charge density  $\sigma$  on electrode surface during the charging process with applying a series of potential differences to the  $\text{Ti}_3\text{C}_2\text{O}_2$  electrodes for [EMIM]  $[\text{NTf}_2]$ .

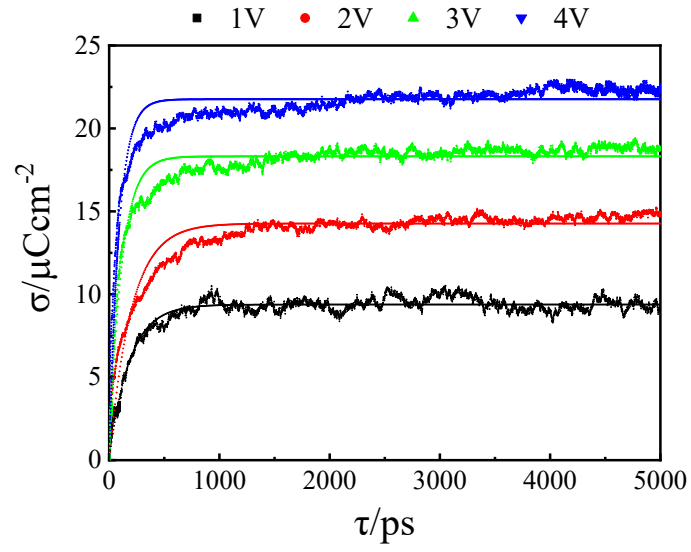

**Fig. S4** Evolution of the charge density  $\sigma$  on electrode surface during the charging process with applying a series of potential differences to the  $\text{Ti}_3\text{C}_2(\text{OH})_2$  electrodes for  $[\text{HEMIm}][\text{NTf}_2]$ .

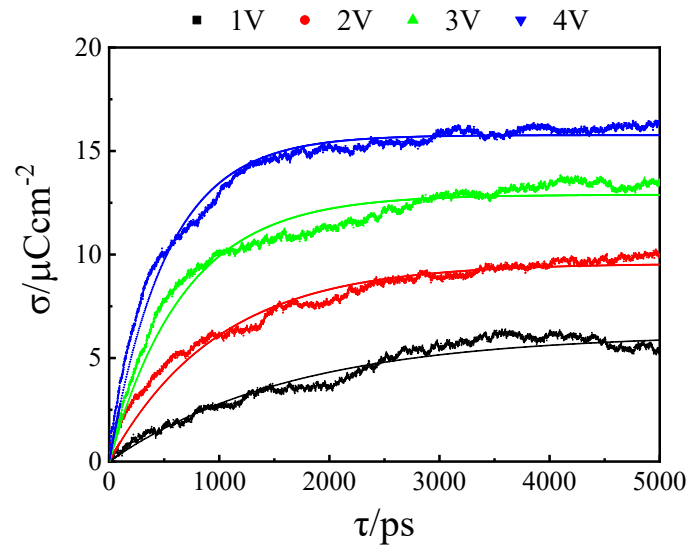

**Fig. S5** Evolution of the charge density  $\sigma$  on electrode surface during the charging process with applying a series of potential differences to the  $\text{Ti}_3\text{C}_2(\text{OH})_2$  electrodes for [EMIM]  $[\text{NTf}_2]$ .

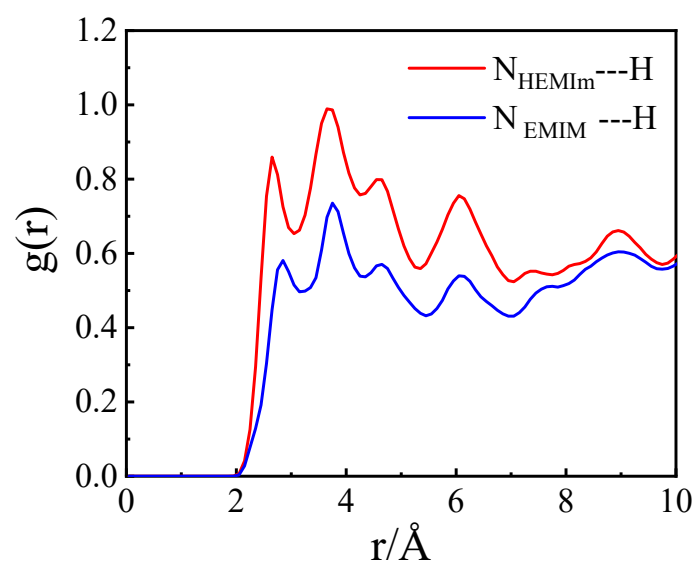

**Fig. S6** Radial distribution function between N atoms in cations and H atoms in the  $\text{Ti}_3\text{C}_2(\text{OH})_2$  electrodes at PZC.



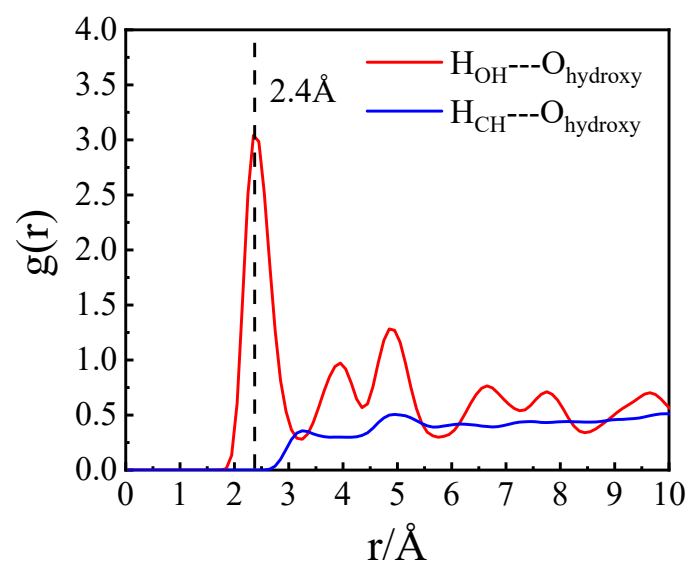

**Fig. S7** Radial distribution function between H atoms of cations and O atoms of the  $\text{Ti}_3\text{C}_2(\text{OH})_2$  electrodes at PZC.

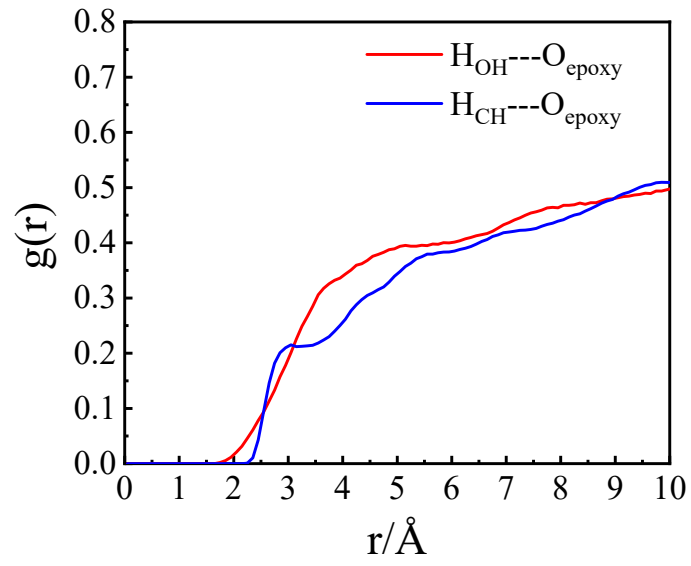

**Fig. S8** Radial distribution function between H atoms of cations and O atoms of the  $\text{Ti}_3\text{C}_2\text{O}_2$  electrodes at PZC.

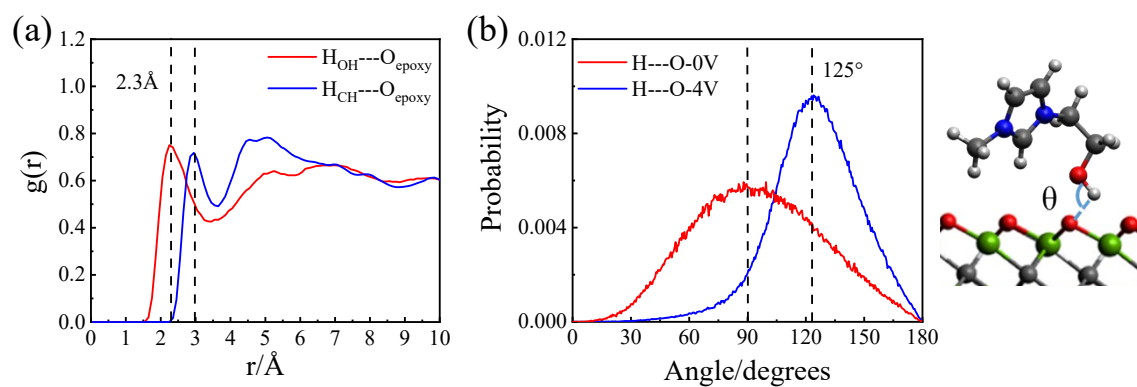

**Fig. S9** (a) Radial distribution function between H atoms of cations and O atoms of  $\text{Ti}_3\text{C}_2\text{O}_2$  electrodes at  $\Delta\Psi = 4\text{V}$ . The oxygen atoms in termination of the  $\text{Ti}_3\text{C}_2\text{O}_2$  electrodes are denoted by  $\text{O}_{\text{epoxy}}$ . (b) distribution of the O-H...O angle between  $\text{H}_{\text{OH}}$  and  $\text{O}_{\text{epoxy}}$  within the distance less than 3  $\text{\AA}$  at  $\Delta\Psi = 0$  and 4V.

We quoted the calculation method of effective ion accumulation factor (EIA) to evaluate the degree of screening efficiency, following Feng

$$EIA(z) = \frac{\int_0^z [\rho_{N,\alpha}(s) - \rho_{N,\alpha}^{\cdot}(s)] ds}{|\sigma|/e}$$

where  $z$  is the distance from the electrode surface,  $\sigma$  is the absolute value of the charge in the electrode,  $e$  is the electron charge, and  $\rho_{counter-ion}$  and  $\rho_{co-ion}$  are the number density of the counterion and coion, respectively.

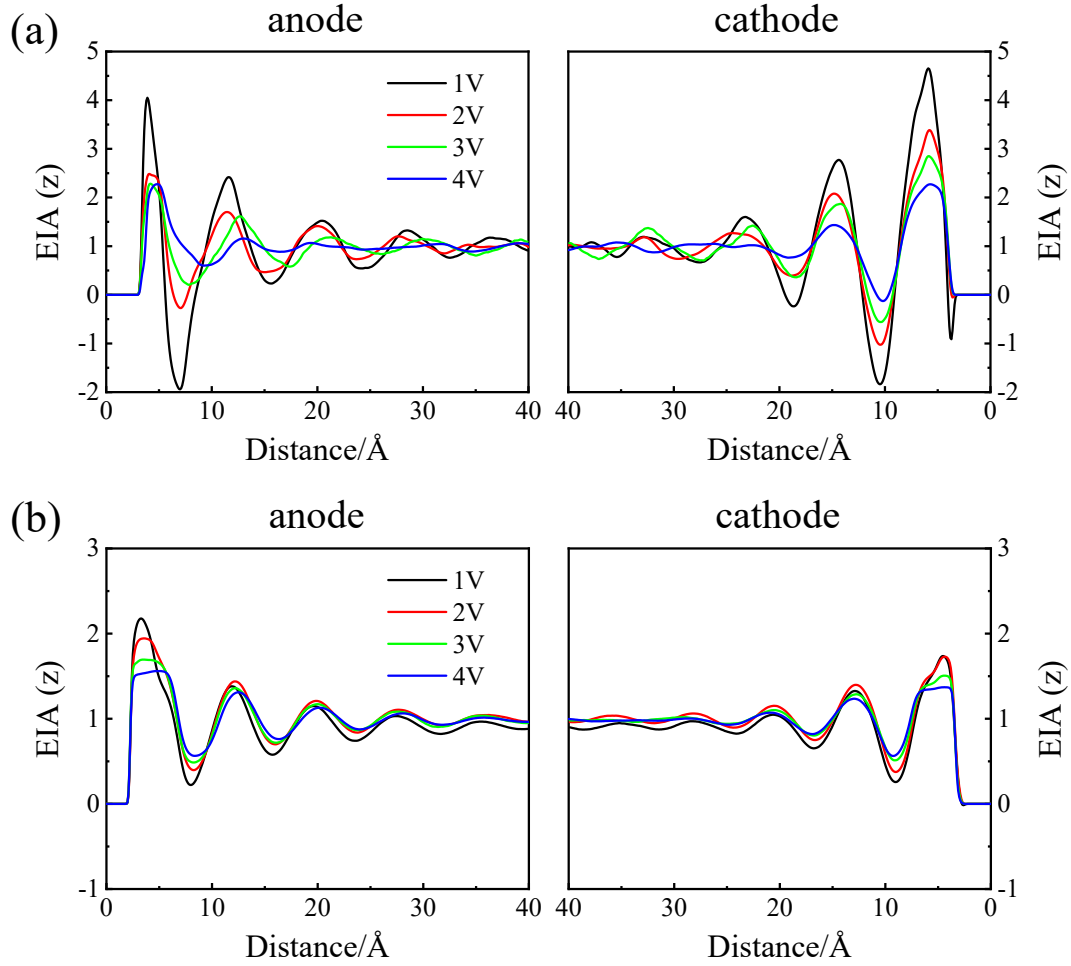

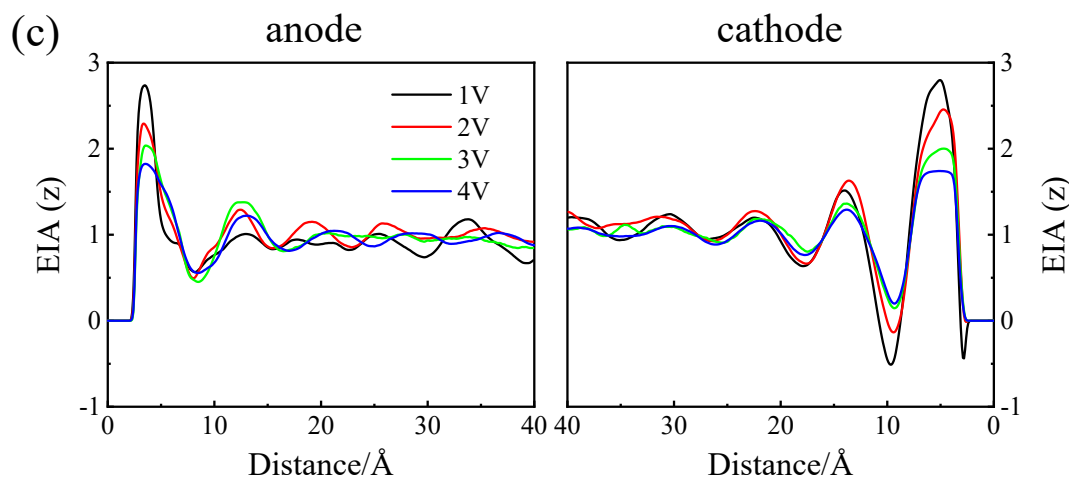

**Fig. S10** EIA factor as a function of distance from the MXene electrode with different applied potentials. EIA profile for [EMIM][TFSI] at  $\text{Ti}_3\text{C}_2\text{O}_2$  electrode and  $\text{Ti}_3\text{C}_2(\text{OH})_2$  electrode (a, c) and for [HEMIm][NTf<sub>2</sub>] at  $\text{Ti}_3\text{C}_2(\text{OH})_2$  electrode (b).

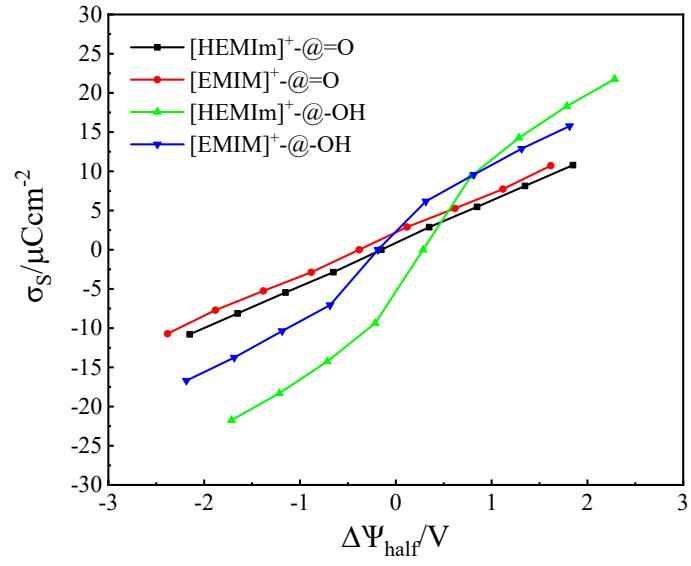

**Fig. S11** Surface charge  $\sigma_s$  as a function of the half potential drop across the interface (

$\Delta\Psi_{half} = \Psi^\pm - \Psi^{bulk} - \text{PZC}$ ) obtained in two ILs at both electrodes.
